# Supplementary material for: Single step synthesis of a magnesium doped lithium manganese oxide ion sieve nanomaterial and a SPES/ion sieve composite membrane for the separation of lithium
Source: Royal Society of Chemistry journal article supplement (doi:10.1039/c6ra14230c), 2016-01-01
Supplement: c6ra14230c1.pdf [file c6ra14230c1.pdf]

### Supplementary Information

## Single Step Synthesis of Magnesium Doped Lithium Manganese Oxide Ionsieve Nanomaterial and SPES/Ionsieve Composite Membrane for the Separation of Lithium

Hitesh Saravaia<sup>1\*</sup>, Hariom Gupta<sup>1\*</sup>, Vaibhav Kulshrestha<sup>2</sup>

<sup>1</sup>Analytical Division and Centralized Instrument Facility, <sup>2</sup>Electro Membrane Process Division, CSIR-Central Salt and Marine Chemical Research Institute, Bhavnagar, India

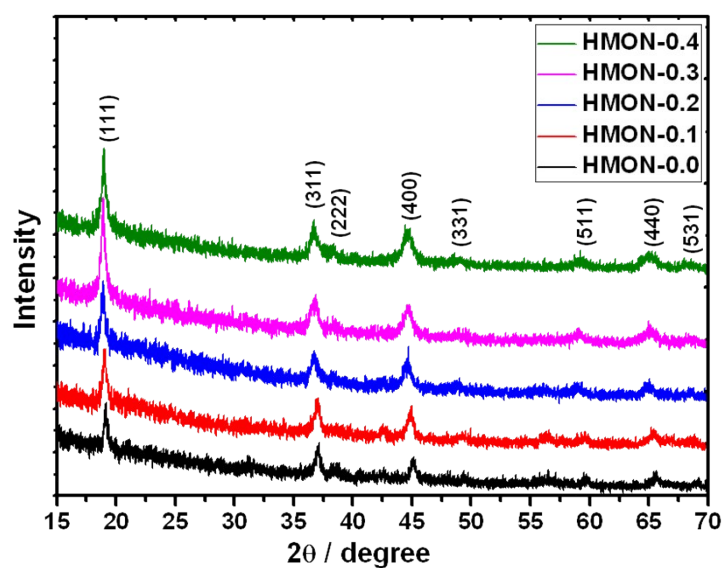

**Figure S1.** Powder XRD of Protonated Samples

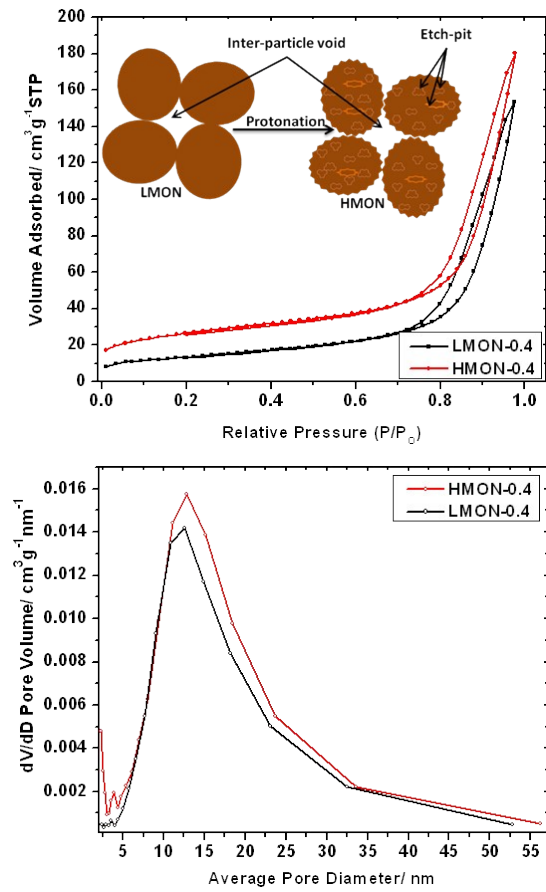

**Figure S2.**  $N_2$  adsorption-desorption BET isotherms and BJH pore size distribution

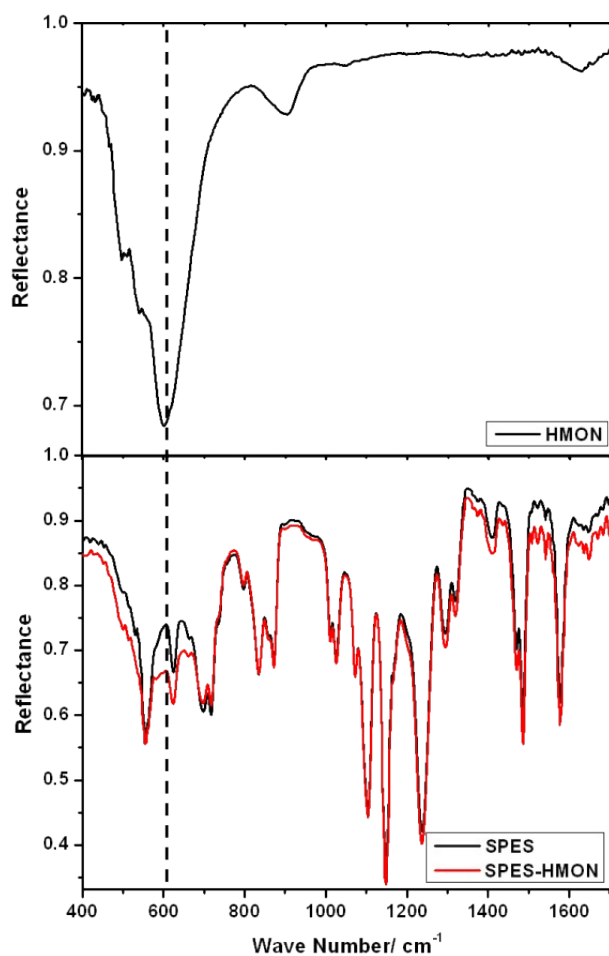

**Figure S3.** FTIR spectra of SPES and SPES-HMON membranes

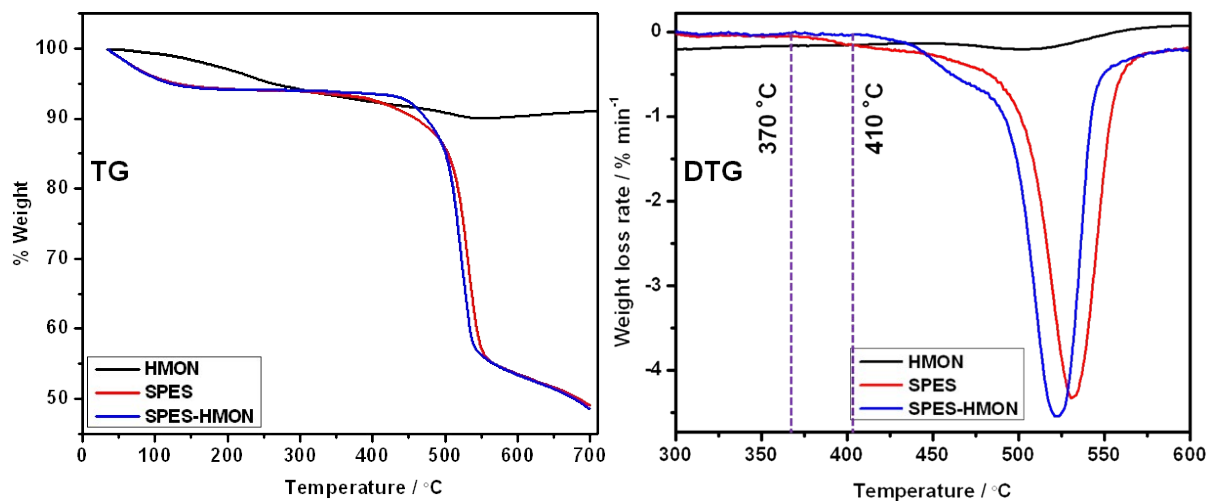

**Figure S4.** TG and DTG results of HMON, SPES and SPES-HMON composite membranes
